# Supplementary material for: Crif1 Deficiency Reduces Adipose OXPHOS Capacity and Triggers Inflammation and Insulin Resistance in Mice
Source: PubMed Central journal article supplement (PMC3597503; doi:10.1371/journal.pgen.1003356), 2013-03-14

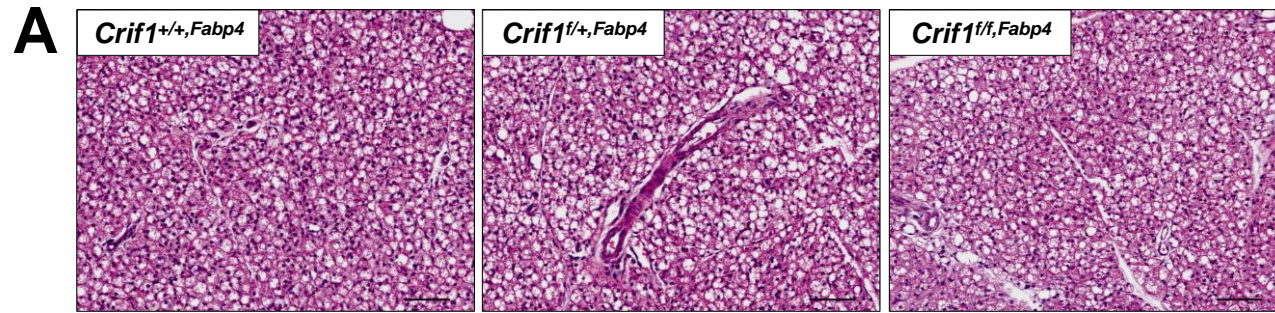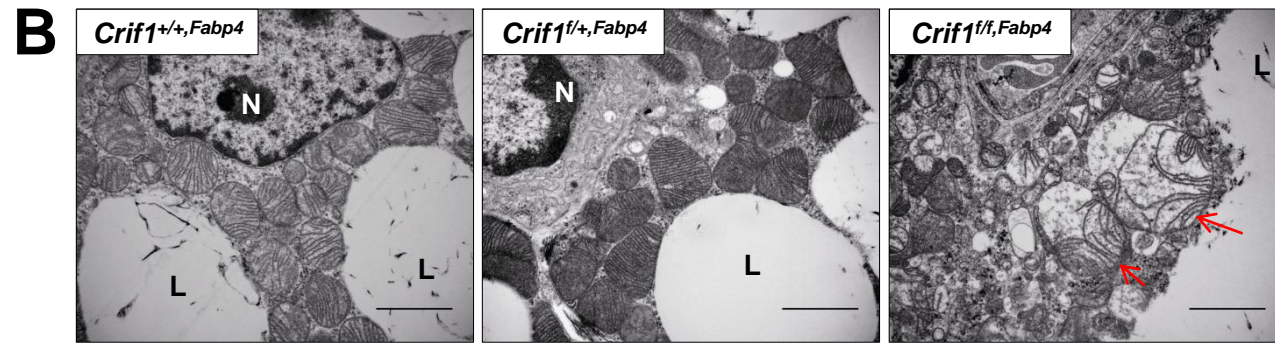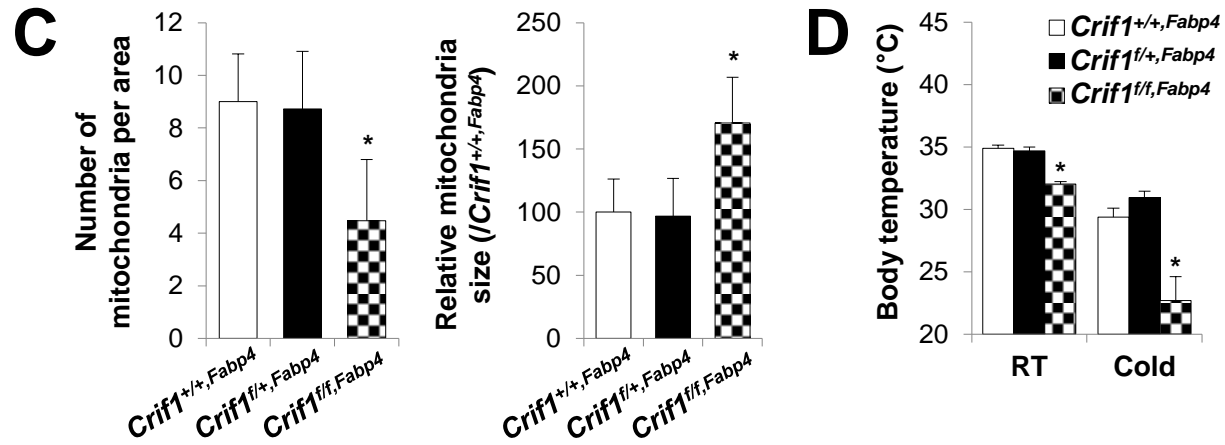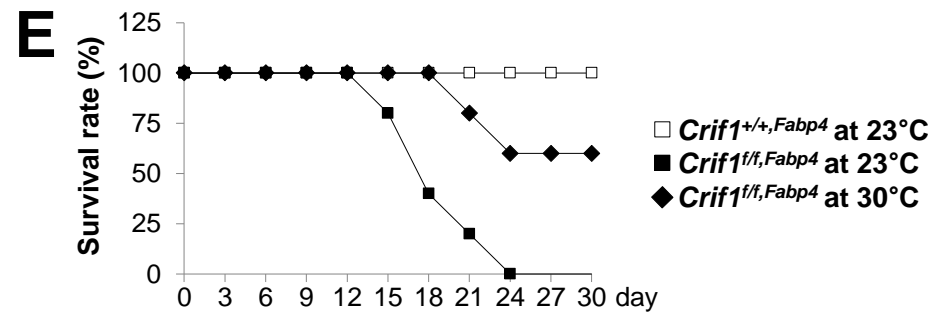

Supplement: pgen.1003356.s002.pdf [file pgen.1003356.s002.pdf]
