# Supplementary material for: Crif1 Deficiency Reduces Adipose OXPHOS Capacity and Triggers Inflammation and Insulin Resistance in Mice
Source: PubMed Central journal article supplement (PMC3597503; doi:10.1371/journal.pgen.1003356), 2013-03-14
Supplement: pgen.1003356.s005.pdf [file pgen.1003356.s005.pdf]

| siCTR            | siCrif1         | Genbank          | GeneSymbol    | GeneName                                               |
|------------------|-----------------|------------------|---------------|--------------------------------------------------------|
| 4.121792         | 36.16663        | NM_144548        | IL23R         | interleukin 23 receptor                                |
| 40.50882         | 58.58208        | NM_011612        | TNFRSF9       | tumor necrosis factor receptor superfamily, member 9   |
| 1961.249         | 2588.521        | NM_009398        | TNFAIP6       | tumor necrosis factor alpha induced protein 6          |
| 28666.23         | 35917.62        | NM_013654        | CCL7          | chemokine (C-C motif) ligand 7                         |
| 24.32665         | 30.60764        | NM_009401        | TNFRSF8       | tumor necrosis factor receptor superfamily, member 8   |
| 7.611051         | 27.08002        | NM_009403        | TNFSF8        | tumor necrosis factor (ligand) superfamily, member 8   |
| 313044.8         | 352221.8        | NM_019494        | CXCL11        | chemokine (C-X-C motif) ligand 11                      |
| 340.7805         | 401.6685        | NM_011332        | CCL17         | chemokine (C-C motif) ligand 17                        |
| 784.6999         | 948.9369        | NM_009399        | TNFRSF11A     | tumor necrosis factor receptor superfamily, member 11a |
| 893.2378         | 992.3398        | NM_145636        | IL27          | interleukin 27                                         |
| 22.12826         | 25.28546        | NM_010552        | IL17A         | interleukin 17A                                        |
| 494.2479         | 620.9611        | NM_009398        | TNFAIP6       | tumor necrosis factor alpha induced protein 6          |
| 59.17831         | 68.91479        | NM_011331        | CCL12         | chemokine (C-C motif) ligand 12                        |
| 1243.83          | 1646.707        | NM_011330        | CCL11         | chemokine (C-C motif) ligand 11                        |
| 194.0143         | 218.5462        | NM_145837        | IL17D         | interleukin 17D                                        |
| 98.8333          | 120.3648        | NM_010555        | IL1R2         | interleukin 1 receptor, type II                        |
| 3470.772         | 3772.112        | NM_134159        | IL17RC        | interleukin 17 receptor C                              |
| 272.4725         | 304.6156        | NM_028075        | TNFRSF13C     | tumor necrosis factor receptor superfamily, member 13c |
| 413.7915         | 534.68024       | NM_031168        | IL6           | interleukin 6                                          |
| 16.18136         | 32.31217        | NM_183391        | TNFSF18       | tumor necrosis factor (ligand) superfamily, member 18  |
| 58.67183         | 93.43846        | NM_010553        | IL18RAP       | interleukin 18 receptor accessory protein              |
| 971.2447         | 1121.058        | NM_008364        | IL1RAP        | interleukin 1 receptor accessory protein               |
| 1455.233         | 2063.002        | NM_010743        | IL1RL1        | interleukin 1 receptor-like 1                          |
| 554.2708         | 702.7033        | NM_001025602     | IL1RL1        | interleukin 1 receptor-like 1                          |
| 692.054          | 856.0938        | NM_009398        | TNFAIP6       | tumor necrosis factor alpha induced protein 6          |
| 49.0237          | 61.19808        | NM_001039701     | IL1RN         | interleukin 1 receptor antagonist                      |
| 21.90168         | 45.19971        | NM_013563        | IL2RG         | interleukin 2 receptor, gamma chain                    |
| 6.868854         | 18.9351         | NM_001013412     | CCL26         | chemokine (C-C motif) ligand 26                        |
| 23.93204         | 31.70892        | NM_178258        | IL22RA2       | interleukin 22 receptor, alpha 2                       |
| 5.921903         | 20.36962        | NM_019568        | CXCL14        | chemokine (C-X-C motif) ligand 14                      |
| 104.4863         | 127.2165        | NM_021349        | TNFRSF13B     | tumor necrosis factor receptor superfamily, member 13b |
| 23.35535         | 34.23926        | NM_145834        | IL17C         | interleukin 17C                                        |
| 1655.112         | 1793.896        | NM_008360        | IL18          | interleukin 18                                         |
| <b>58167.016</b> | <b>81624.16</b> | <b>NM_011333</b> | <b>CCL2</b>   | <b>chemokine (C-C motif) ligand 2</b>                  |
| 79832.97         | 88935.83        | NM_001172054     | IL11RA1       | interleukin 11 receptor, alpha chain 1                 |
| 954.9624         | 1056.854        | NM_029646        | IL34          | interleukin 34                                         |
| 19827.82         | 22730.69        | NM_010560        | IL6ST         | interleukin 6 signal transducer                        |
| 37.25387         | 44.44884        | NM_028075        | TNFRSF13C     | tumor necrosis factor receptor superfamily, member 13c |
| 90.76215         | 117.2686        | NM_139299        | IL31RA        | interleukin 31 receptor A                              |
| 1739.551         | 2058.738        | NM_011614        | TNFSF12       | tumor necrosis factor (ligand) superfamily, member 12  |
| <b>1978.869</b>  | <b>2382.897</b> | <b>NM_013653</b> | <b>CCL5</b>   | <b>chemokine (C-C motif) ligand 5</b>                  |
| 45.11165         | 60.9423         | NM_008764        | TNFRSF11B     | tumor necrosis factor receptor superfamily, member 11b |
| <b>1260.824</b>  | <b>1926.372</b> | <b>NM_021274</b> | <b>CXCL10</b> | <b>chemokine (C-X-C motif) ligand 10</b>               |
| 5715.326         | 7169.517        | NM_011338        | CCL9          | chemokine (C-C motif) ligand 9                         |
| 685.4969         | 1091.775        | NM_134437        | IL17RD        | interleukin 17 receptor D                              |
| 2263.516         | 3224.157        | NM_021443        | CCL8          | chemokine (C-C motif) ligand 8                         |
| 304.5928         | 367.2768        | NM_008353        | IL12RB1       | interleukin 12 receptor, beta 1                        |
| 37.51998         | 75.69471        | NM_009400        | TNFRSF18      | tumor necrosis factor receptor superfamily, member 18  |
| 37.8838          | 43.56515        | NM_027206        | TNFAIP8L2     | tumor necrosis factor, alpha-induced protein 8-like 2  |
| 13.8947          | 28.78862        | NM_080729        | IL25          | interleukin 25                                         |
| 1734.652         | 3219.236        | NM_008369        | IL3RA         | interleukin 3 receptor, alpha chain                    |
| 71.48267         | 80.16624        | NM_177371        | TNFSF15       | tumor necrosis factor (ligand) superfamily, member 15  |
| <b>43.57612</b>  | <b>62.77047</b> | <b>NM_008599</b> | <b>CXCL9</b>  | <b>chemokine (C-X-C motif) ligand 9</b>                |
| 30.23543         | 41.89107        | NM_153077        | IL1F10        | interleukin 1 family, member 10                        |
| 255.5504         | 379.3089        | NM_001164724     | IL33          | interleukin 33                                         |
| 15516.67         | 16859.38        | NM_009396        | TNFAIP2       | tumor necrosis factor, alpha-induced protein 2         |
| 1309.808         | 1477.902        | NM_025566        | TNFAIP8L1     | tumor necrosis factor, alpha-induced protein 8-like 1  |
| 111.9911         | 133.0651        | NM_178931        | TNFRSF14      | tumor necrosis factor receptor superfamily, member 14  |
| 40.64213         | 57.88874        | NM_145856        | IL17F         | interleukin 17F                                        |
| 124.1442         | 142.8147        | NM_008368        | IL2RB         | interleukin 2 receptor, beta chain                     |
| 617.4527         | 348.2624        | NM_008356        | IL13RA2       | interleukin 13 receptor, alpha 2                       |
| 1066.871         | 587.4594        | NM_001034031     | IL17RE        | interleukin 17 receptor E                              |
| 2160.096         | 1276.128        | NM_009139        | CCL6          | chemokine (C-C motif) ligand 6                         |
| 101.98523        | 59.25557        | NM_021283        | IL4           | interleukin 4                                          |
| 93.71742         | 40.71966        | NM_019577        | CCL24         | chemokine (C-C motif) ligand 24                        |
| 31.92887         | 22.55596        | NM_008355        | IL13          | interleukin 13                                         |
| 91.77756         | 72.49704        | NM_024290        | TNFRSF23      | tumor necrosis factor receptor superfamily, member 23  |
| 196.8808         | 81.45166        | NM_178257        | IL22RA1       | interleukin 22 receptor, alpha 1                       |
| 44.34467         | 28.77423        | NM_010556        | IL3           | interleukin 3                                          |
| 1034.483         | 664.6325        | NM_018866        | CXCL13        | chemokine (C-X-C motif) ligand 13                      |
| 4273.788         | 3079.896        | NM_008176        | CXCL1         | chemokine (C-X-C motif) ligand 1                       |
| 335.2468         | 27.00682        | NM_019508        | IL17B         | interleukin 17B                                        |
| 82.60403         | 65.24875        | NM_010558        | IL5           | interleukin 5                                          |
| 31.3036          | 22.62042        | NM_008348        | IL10RA        | interleukin 10 receptor, alpha                         |
| 8953.882         | 6847.658        | NM_020275        | TNFRSF10B     | tumor necrosis factor receptor superfamily, member 10b |
| 339.0015         | 262.4593        | NM_133990        | IL13RA1       | interleukin 13 receptor, alpha 1                       |
| 5624.466         | 3258.674        | NM_009138        | CCL25         | chemokine (C-C motif) ligand 25                        |
